# Supplementary material for: Dominant Impacting Factors on Water-Use Efficiency Variation in Inner Mongolia from 2001 to 2018: Vegetation or Climate?
Source: MDPI journal article supplement (doi:10.3390/rs14184541), 2022-09-11
Supplement: s1 [file s1]

Archive with 1 entries (1 files):
- remotesensing-1885505-supplementary.pdf
