# Supplementary material for: Dominant Impacting Factors on Water-Use Efficiency Variation in Inner Mongolia from 2001 to 2018: Vegetation or Climate?
Source: MDPI journal article supplement (doi:10.3390/rs14184541), 2022-09-11
Supplement: s1 [file s1 › remotesensing-1885505-supplementary.pdf]

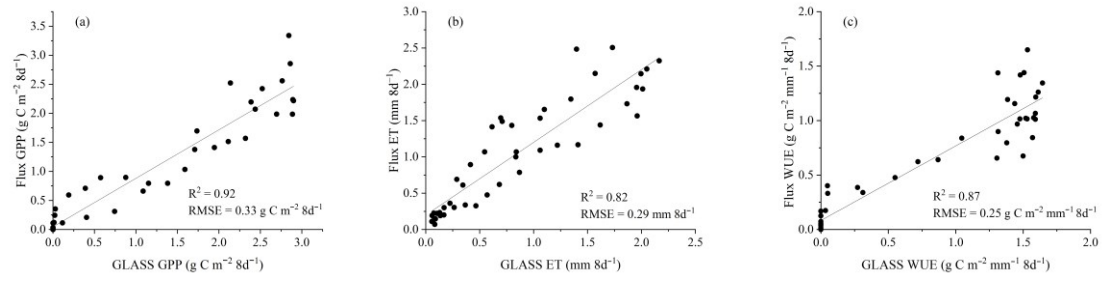

**Figure S1.** Evaluation of GLASS eight-day composite 1 km resolution **(a)** GPP, **(b)** ET, and **(c)** WUE products against flux observations.
